# Supplementary material for: Alterations in the Kynurenine–Tryptophan Pathway and Lipid Dysregulation Are Preserved Features of COVID-19 in Hemodialysis
Source: MDPI journal article supplement (doi:10.3390/ijms232214089), 2022-11-15

## SUPPLEMENTARY MATERIALS AND METHODS – TABLE OF CONTENT

|                                                                                                              | <i>Page number</i> |
|--------------------------------------------------------------------------------------------------------------|--------------------|
| <b>Figure S1</b> Disturbances of the arginine and proline pathway and purine metabolism in COVID-19          | 2                  |
| <b>Figure S2</b> Distinctively deregulated metabolites in moderate COVID-19 between HD and non-HD            | 3                  |
| <b>Figure S3</b> Creatinine levels and association of creatinine with markers of moderate COVID-19 in non-HD | 4                  |



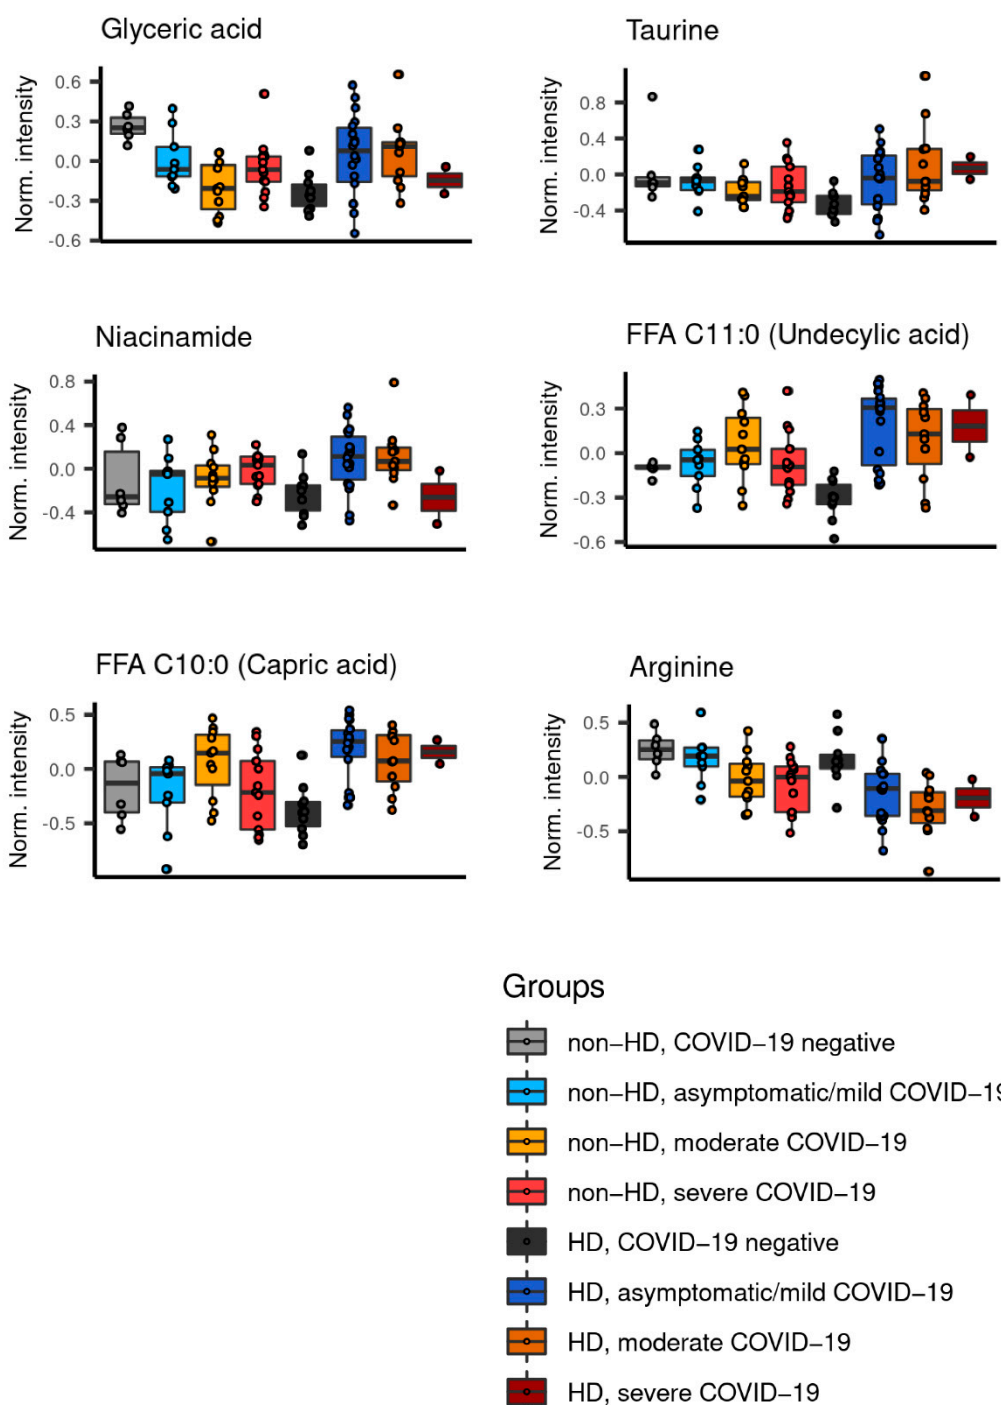

## A Creatinine

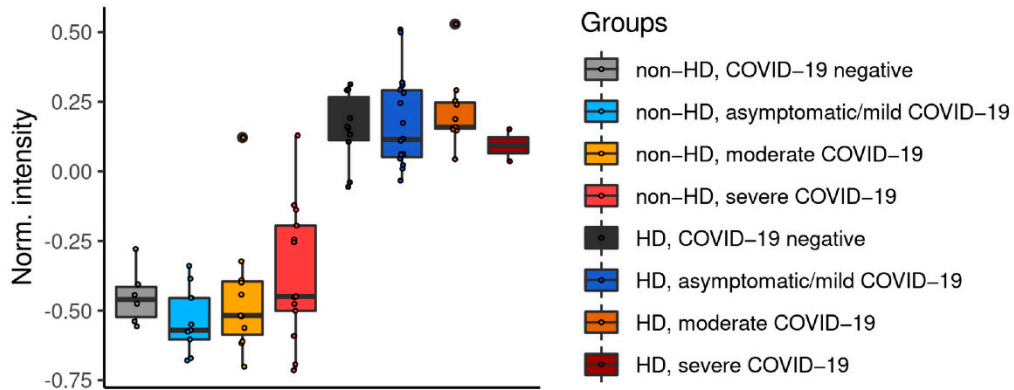

## B

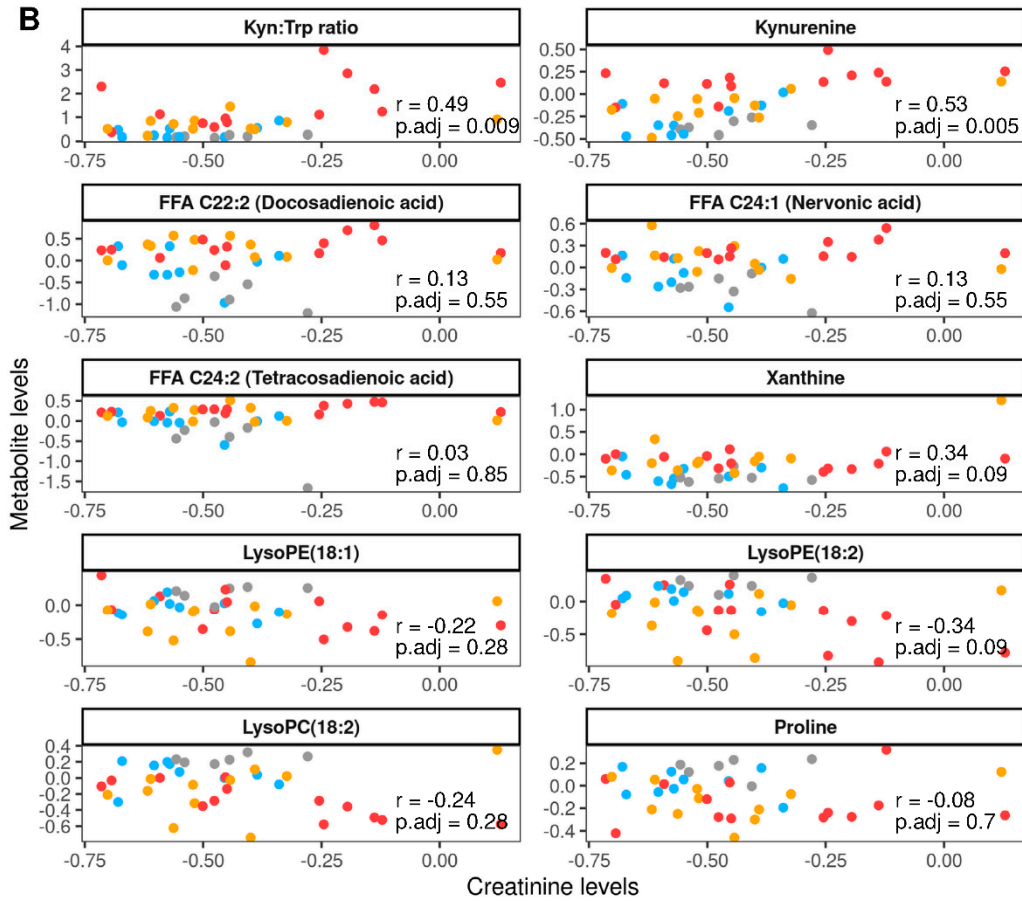

Supplement: s1 [file s1]
